# Supplementary material for: Esterase-sensitive cleavable histone deacetylase inhibitor-coupled hyaluronic acid nanoparticles for boosting anticancer activities against lung adenocarcinoma
Source: Royal Society of Chemistry journal article supplement (doi:10.1039/c9bm00895k), 2019-01-01
Supplement: c9bm00895k1.pdf [file c9bm00895k1.pdf]

## Supplementary Information

### **Esterase-sensitive cleavable histone deacetylase inhibitor-coupled hyaluronic acid nanoparticles for boosting anticancer activities against lung adenocarcinoma**

Song Yi Lee<sup>a,1</sup>, Eun-Hye Hong<sup>b,1</sup>, Jae Young Jeong<sup>a</sup>, Jaewon Cho<sup>b</sup>, Ji-Hye Seo,<sup>a</sup> Hyun-Jeong  
Ko<sup>b,\*</sup>, Hyun-Jong Cho<sup>a,\*\*</sup>

<sup>a</sup>College of Pharmacy, Kangwon National University, Chuncheon, Gangwon 24341, Republic  
of Korea.

<sup>b</sup>Laboratory of Microbiology and Immunology, College of Pharmacy, Kangwon National  
University, Chuncheon, Gangwon 24341, Republic of Korea.

<sup>1</sup>These authors equally contributed to this work.

\* Corresponding author. Tel.: +82 33 250 6923; fax: +82 33 259 5631.

\*\* Corresponding author. Tel.: +82 33 250 6916; fax: +82 33 259 5631.

*E-mail addresses:* hjko@kangwon.ac.kr (H.-J. Ko), hjcho@kangwon.ac.kr (H.-J. Cho).

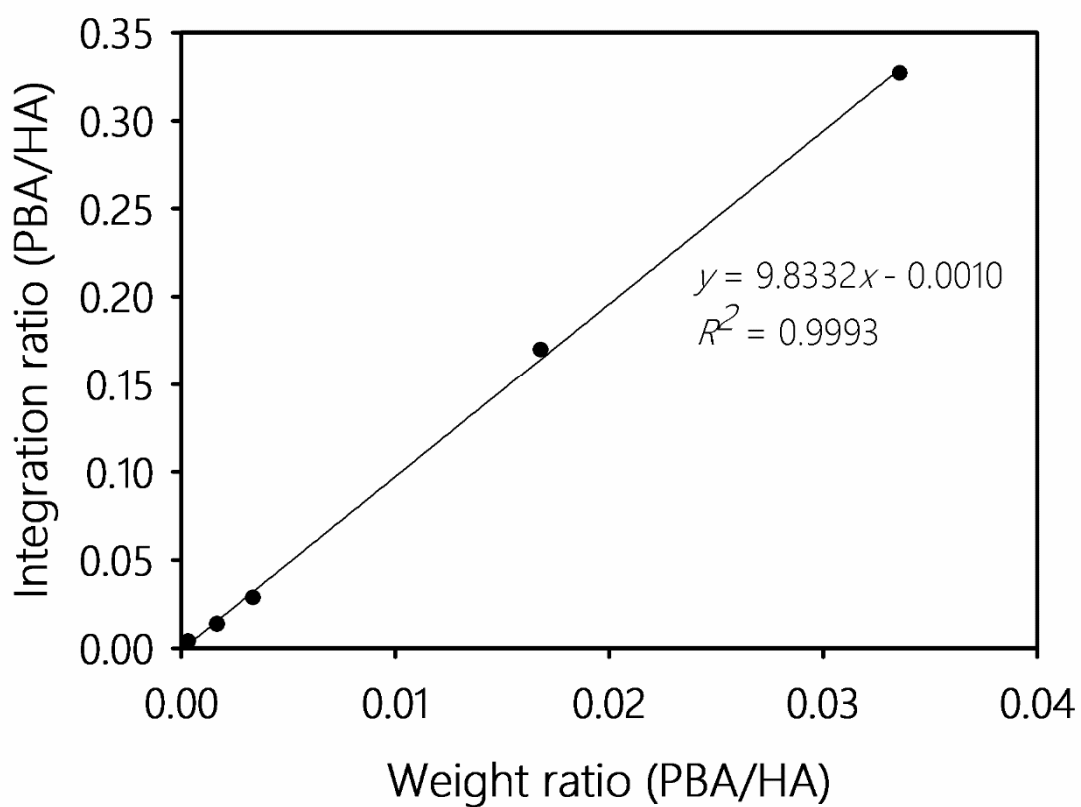

**Fig. S1.** Regression line of integration ratio (PBA/HA) to weight ratio (PBA/HA).

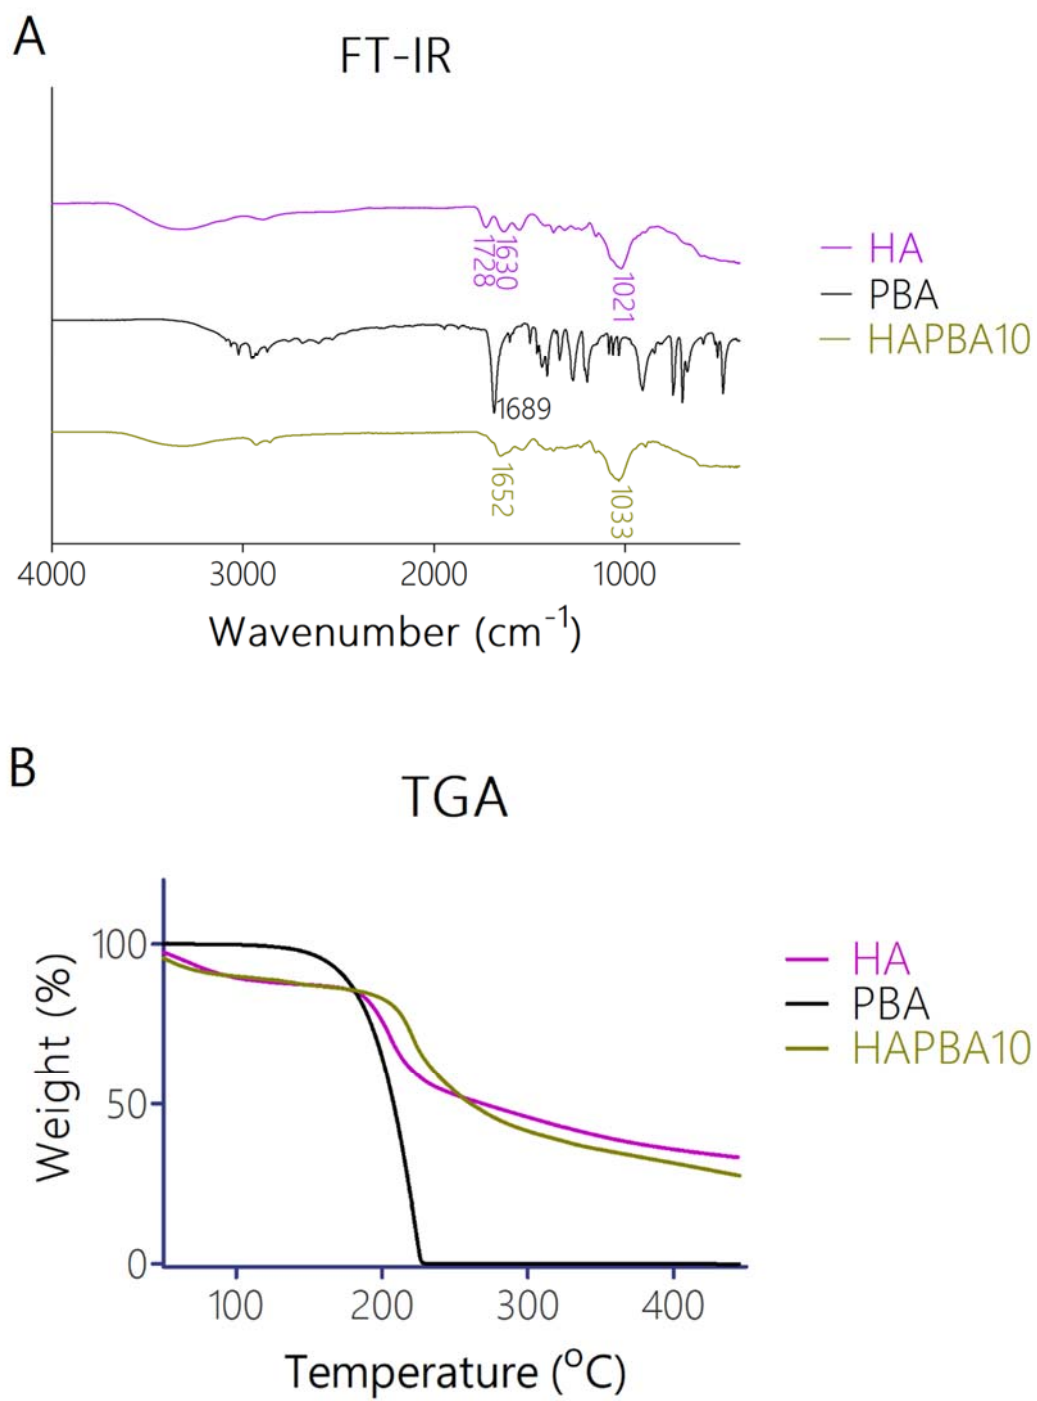

**Fig. S2.** Characterization of HA, PBA, and HAPBA10 by (A) FT-IR and (B) TGA analyses.

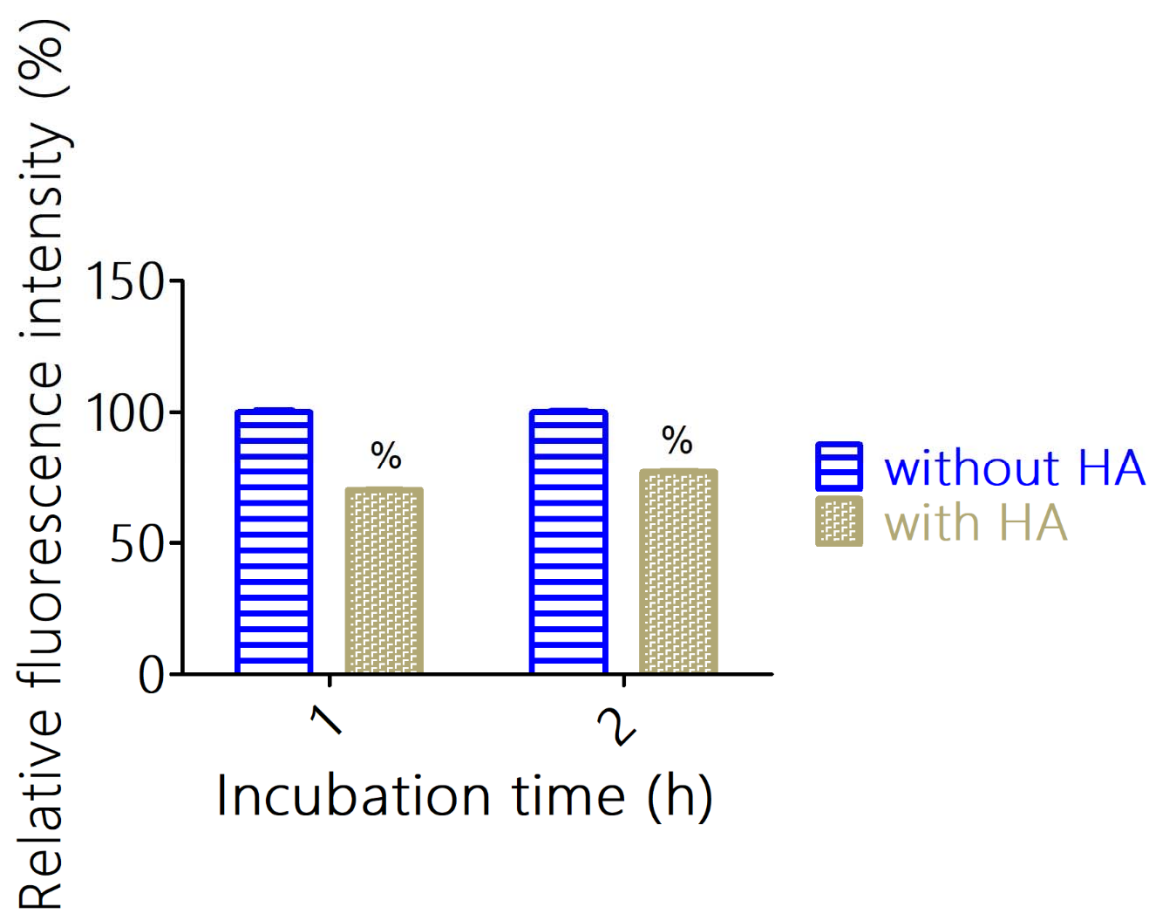

**Fig. S3.** Influences of HA treatment to the cellular accumulation of Cy5.5-HAPBA10/CUR NPs in A549 cells. Each point represents the mean  $\pm$  SD ( $n = 3$ ).  $^{\%}p < 0.05$ , compared with without HA group.

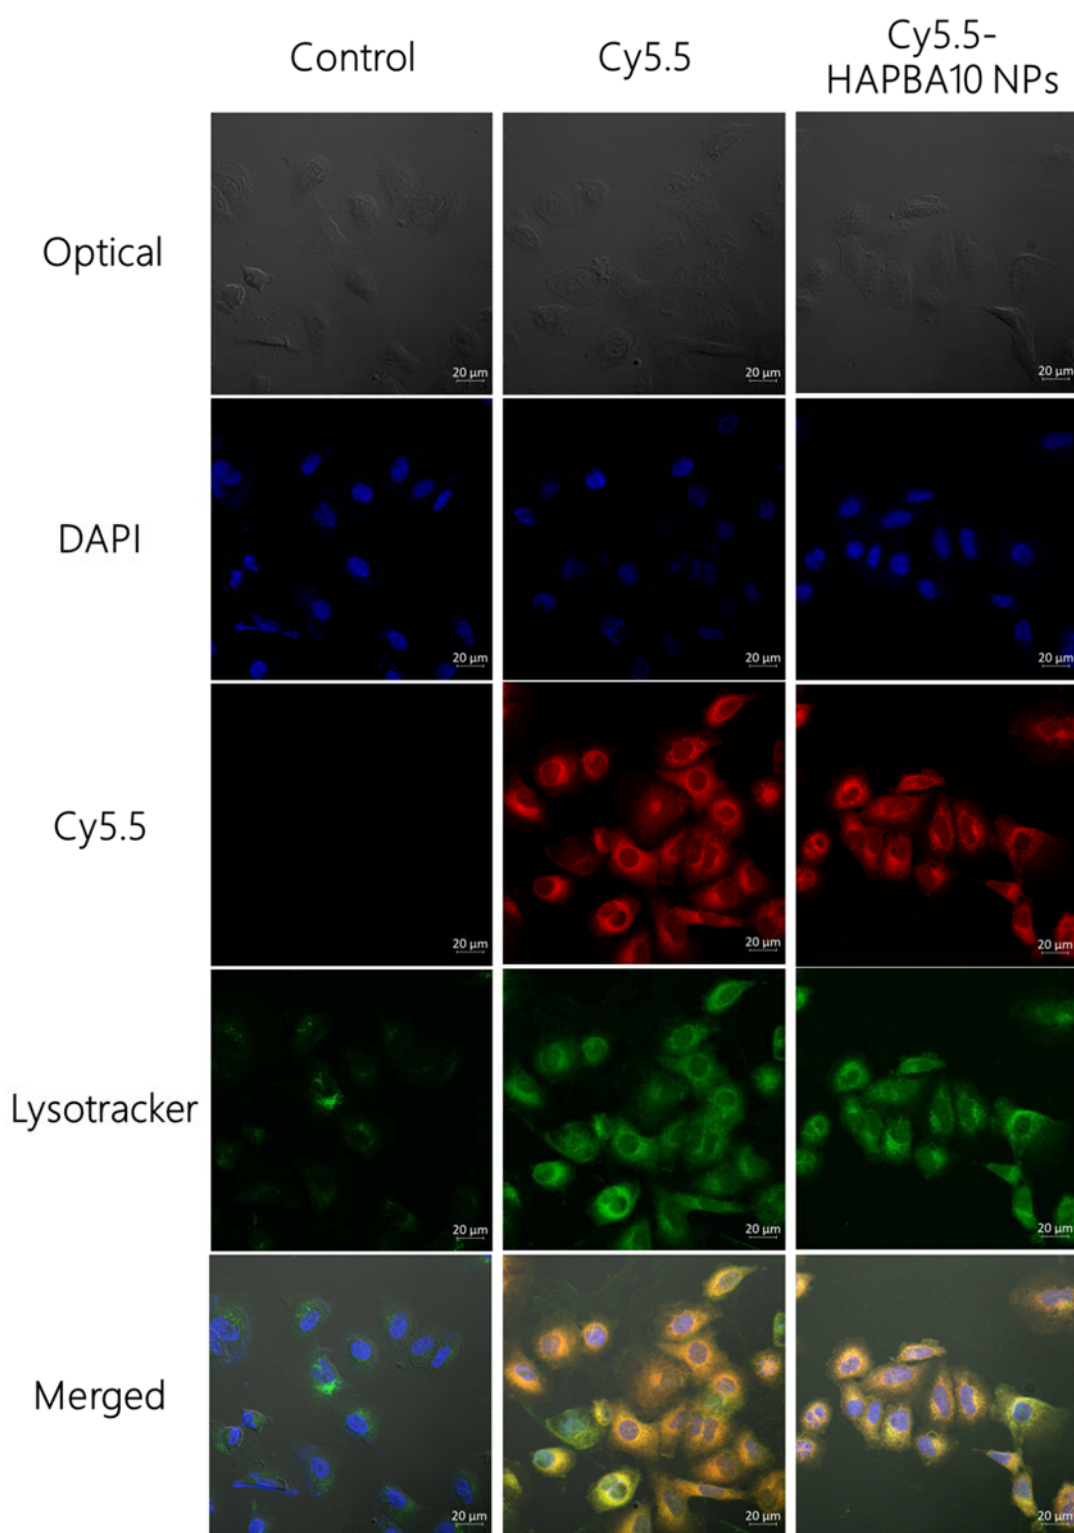

**Fig. S4.** CLSM images of control, Cy5.5, and Cy5.5-HAPBA10 NPs groups after incubating with Lysotracker. Optical, DAPI, Cy5.5, Lysotracker, and merged images are shown.

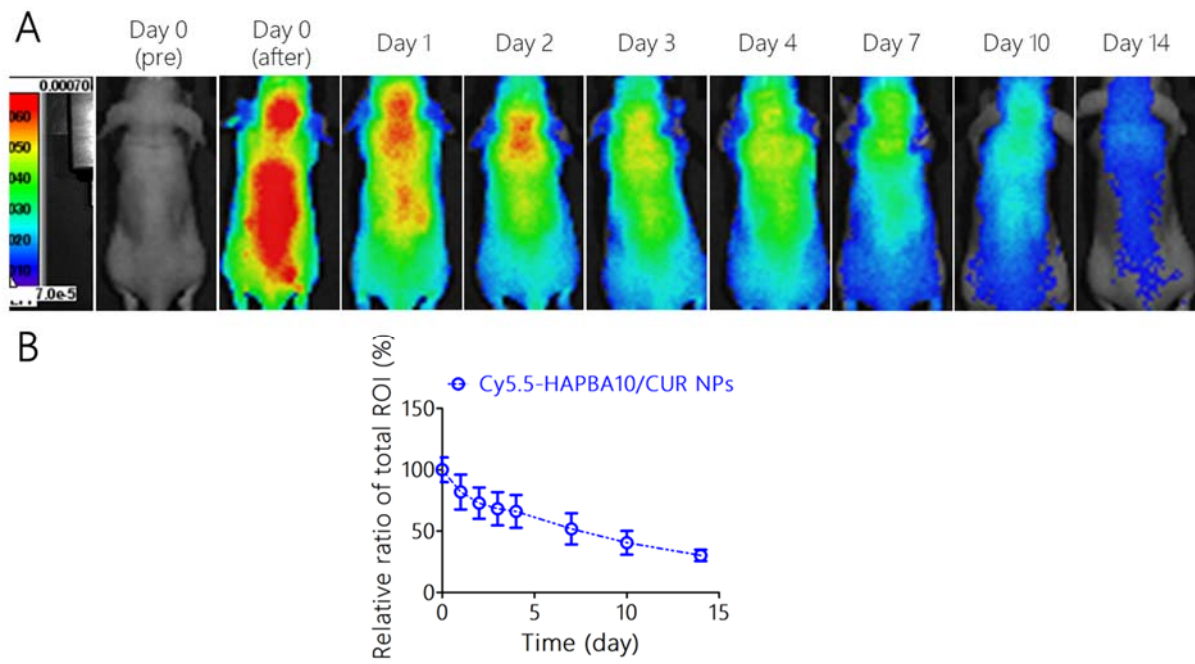

**Fig. S5.** NIRF signal profiles of Cy5.5-HAPBA10/CUR NPs in normal mouse after intravenous injection. (A) Whole-body scanned NIRF images and (B) time-dependent relative ratio of total ROI values are shown. Each point represents the mean  $\pm$  SD ( $n = 3$ ).

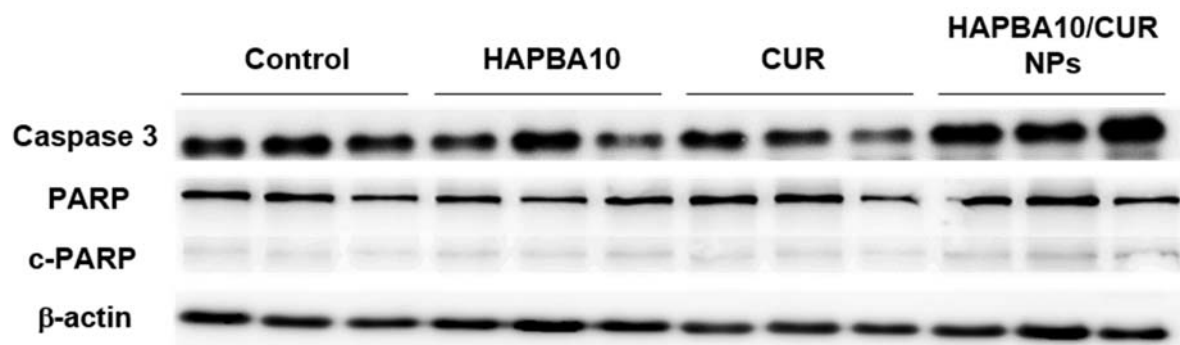

**Fig. S6.** Western blotting assay for detecting apoptosis-related markers expressed in A549 tumor tissues. Bands of caspase 3, PARP, c-PARP, and  $\beta$ -actin in control, HAPBA10, CUR, and HAPBA10/CUR NPs groups are presented.
